# Supplementary material
Source: publisher site journal article supplement (https://www.dovepress.com/article/284279)
Supplement: Supplementary file 1 [file get_supplementary_file.php]

Supplementary Figure 1

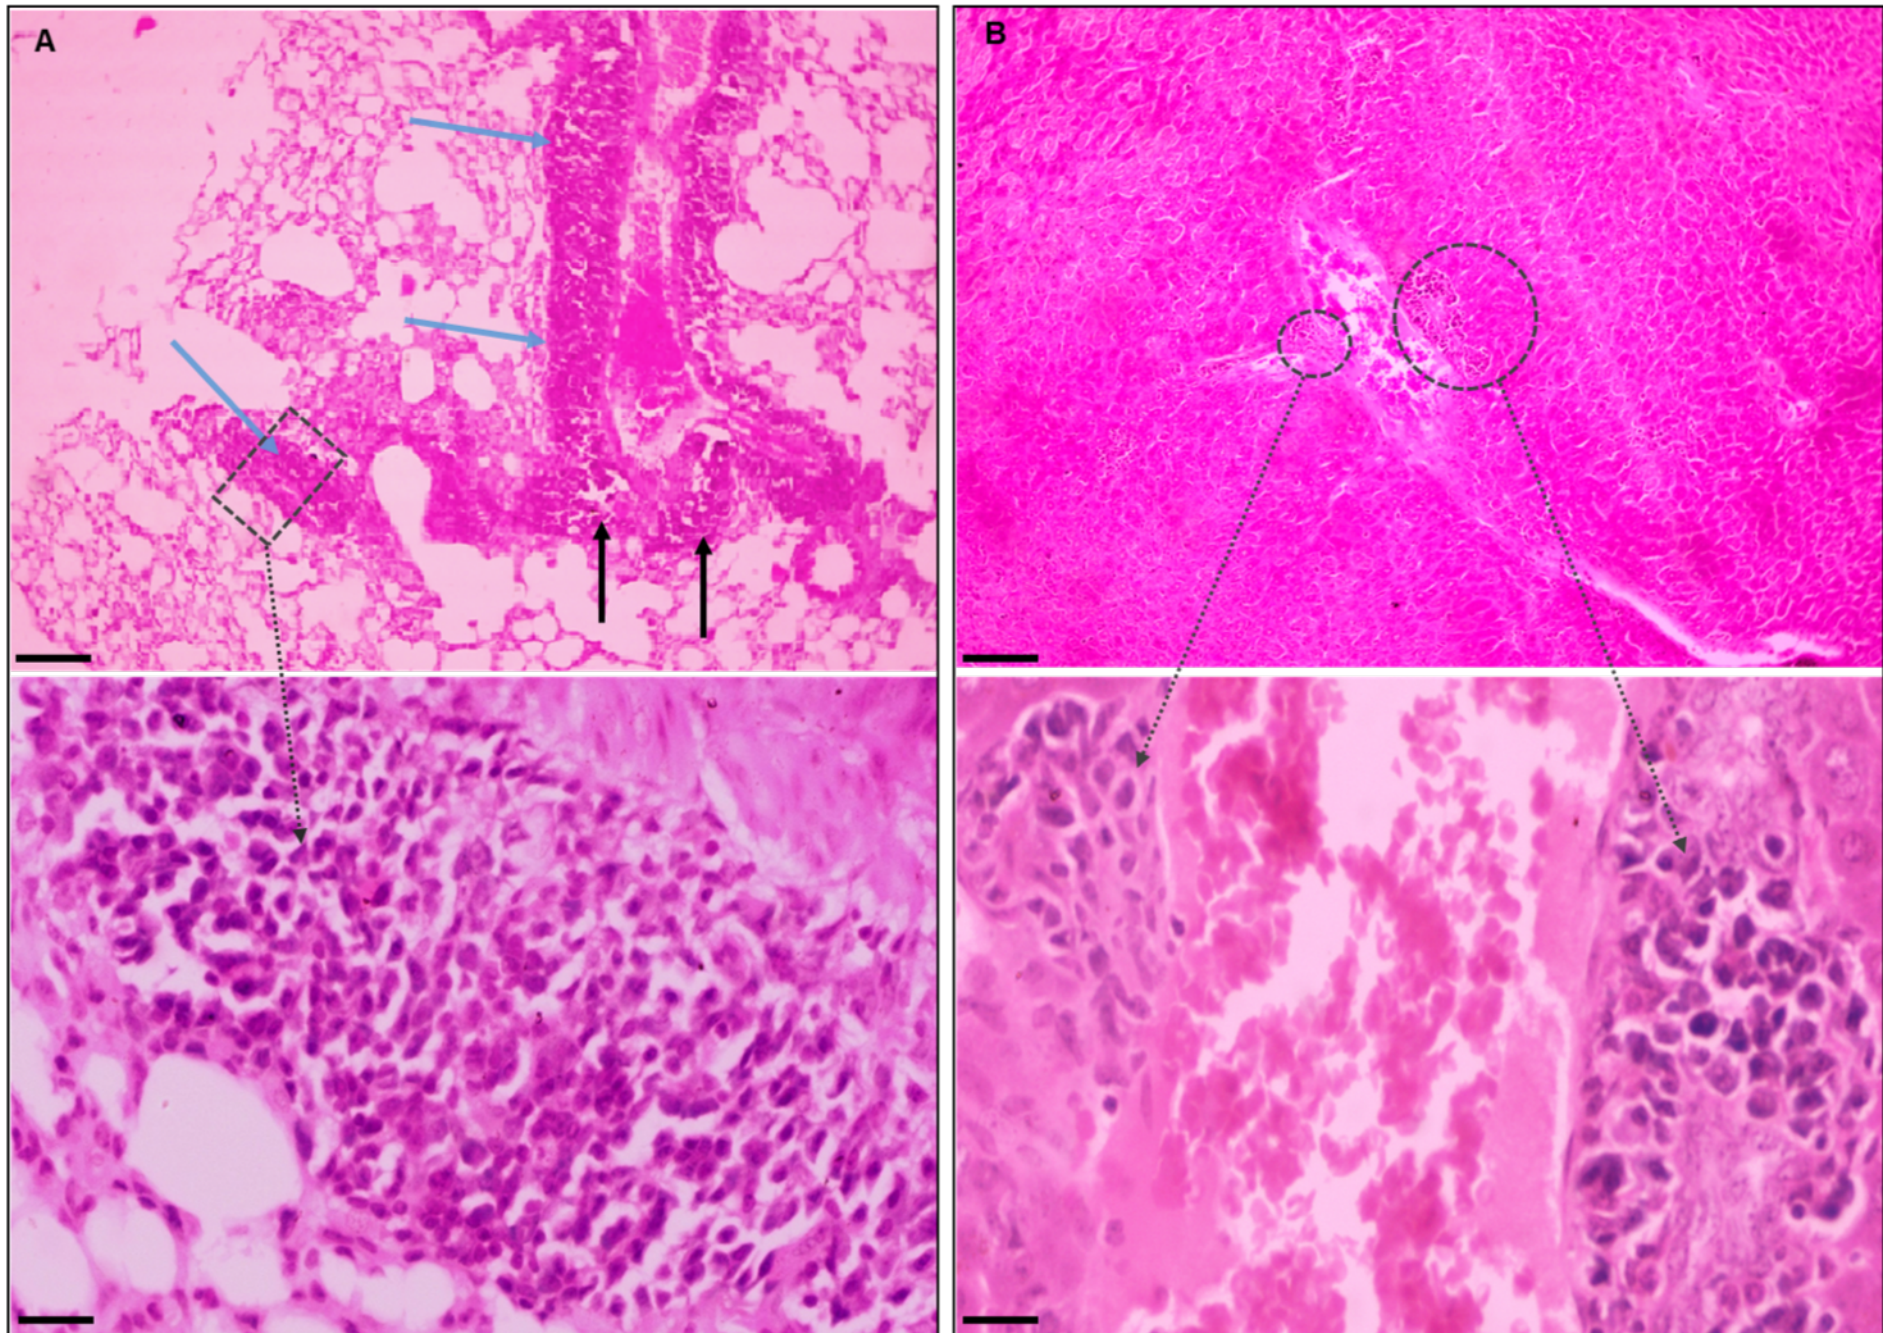

### **Legends to supplementary figure**

#### **Supplementary Figure 1 (S1): Development of cancer by BaP in lungs and liver**

**Notes:** The representative H&E stained images of: **(A)** G2 Lungs: section is showing clumps of malignant tumor consisting of sheets of small cells (blue arrow) with frequent necrosis (black arrow). **(B)** G2 Liver: is showing focal clusters of small malignant cells within and beside the blood vessel indicating vascular invasion. H&E staining, upper panel: 100x, bar = 100  $\mu$ m; lower panel: 400x, bar = 50  $\mu$ m.
